# Supplementary material for: Fabrication of mixed matrix membranes with regulated MOF fillersviaincorporating guest molecules for optimizing light hydrocarbon separation performance
Source: Royal Society of Chemistry journal article supplement (doi:10.1039/d2ce01073a), 2022-01-01
Supplement: d2ce01073a1.pdf [file d2ce01073a1.pdf]

# Supplementary Information

## **Fabrication of Mixed Matrix Membranes with Regulated MOF Fillers via Incorporating Guest Molecules for Optimizing Light Hydrocarbons Separation Performance**

Yang Feng<sup>b, ‡</sup>, LiTing Yu<sup>a, ‡</sup>, Kai Zhang<sup>b</sup>, Weidong Fan<sup>a</sup>, Lili Fan<sup>a, \*</sup>, Zixi Kang<sup>a, \*</sup>, Daofeng Sun<sup>a</sup>

*<sup>a</sup>School of Materials Science and Engineering, China University of Petroleum (East China), Qingdao, Shandong, 266580, PR China.*

*<sup>b</sup>College of Chemistry and Chemical Engineering, China University of Petroleum (East China), Qingdao, Shandong, 266580, PR China.*

# Contents

|                                                               |          |
|---------------------------------------------------------------|----------|
| <b>1. Characterizations of PIM-1 .....</b>                    | <b>1</b> |
| <b>2. Characterizations of fillers .....</b>                  | <b>3</b> |
| <b>3. Characterizations and performance of membranes.....</b> | <b>6</b> |

## 1. Characterizations of PIM-1

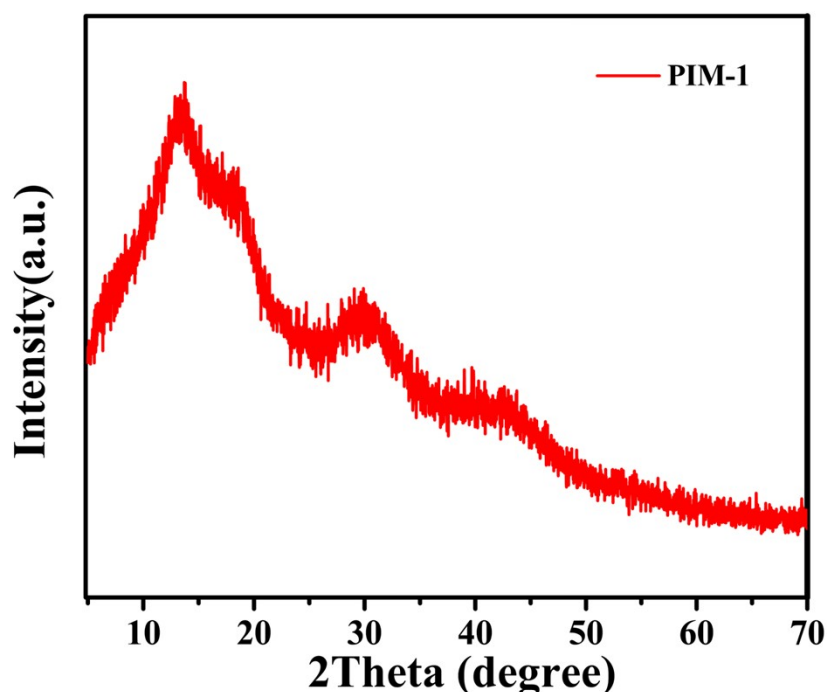

Fig. S1. PXRD patterns of PIM-1.

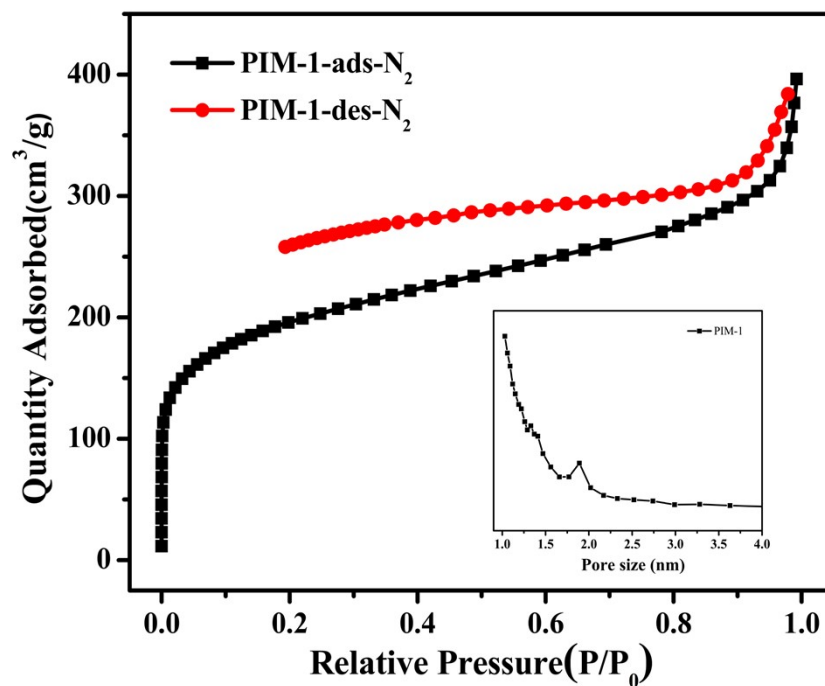

Fig. S2.  $N_2$  adsorption/desorption isotherms of PIM-1 at 77 K.

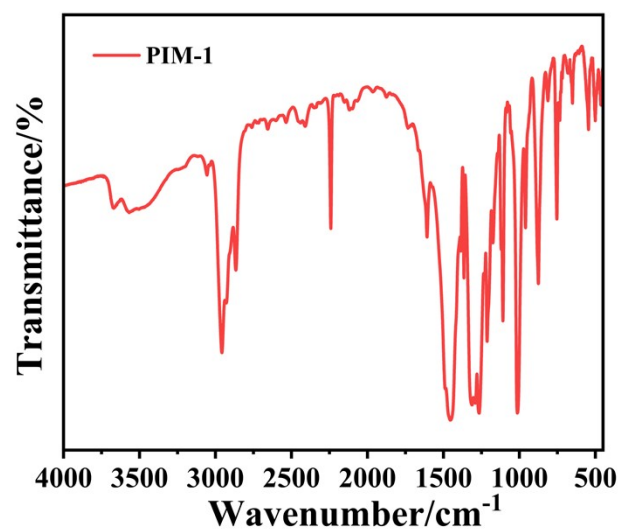

Fig. S3. FTIR spectrum of PIM-1.

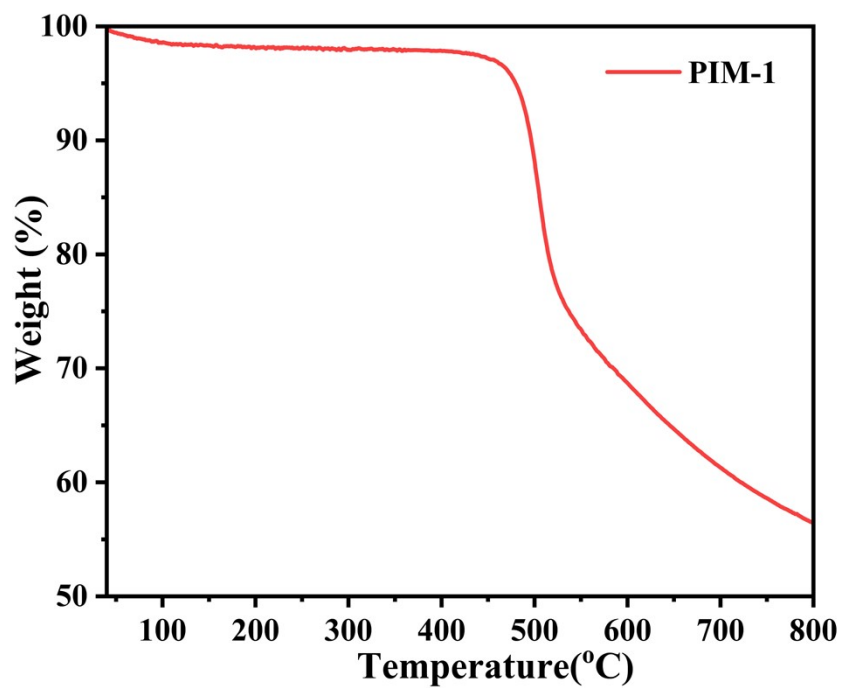

Fig. S4. TGA of PIM-1 under a nitrogen atmosphere.

## 2. Characterizations of fillers

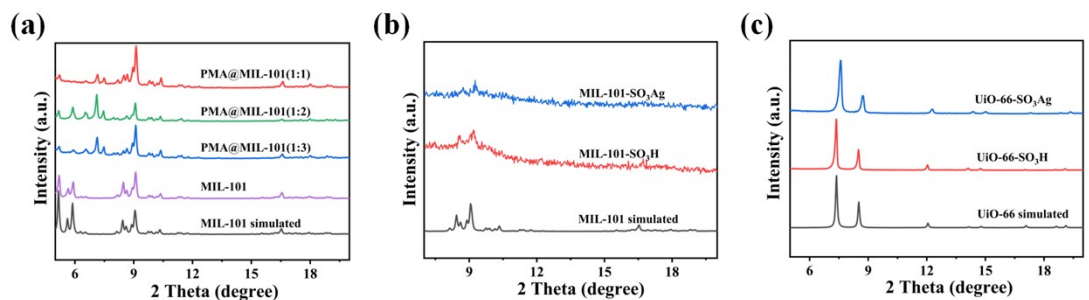

**Fig. S5.** The partial enlarged view of PXRD patterns for pristine and optimized (a) MIL-101, (b) MIL-101-SO<sub>3</sub>H and (c) UiO-66-SO<sub>3</sub>H series powder.

**Table S1.** The surface area calculated based on the N<sub>2</sub> (77 K) adsorption-desorption experiment for MIL-101 and UiO-66 series

| Filler                     | BET(m <sup>2</sup> /g) |
|----------------------------|------------------------|
| MIL-101                    | 2458                   |
| PMA@MIL-101(1:1)           | 1263                   |
| PMA@MIL-101(1:2)           | 1480                   |
| PMA@MIL-101(1:3)           | 1911                   |
| MIL-101-SO <sub>3</sub> H  | 593                    |
| MIL-101-SO <sub>3</sub> Ag | 374                    |
| UiO-66-SO <sub>3</sub> H   | 482                    |
| UiO-66-SO <sub>3</sub> Ag  | 397                    |

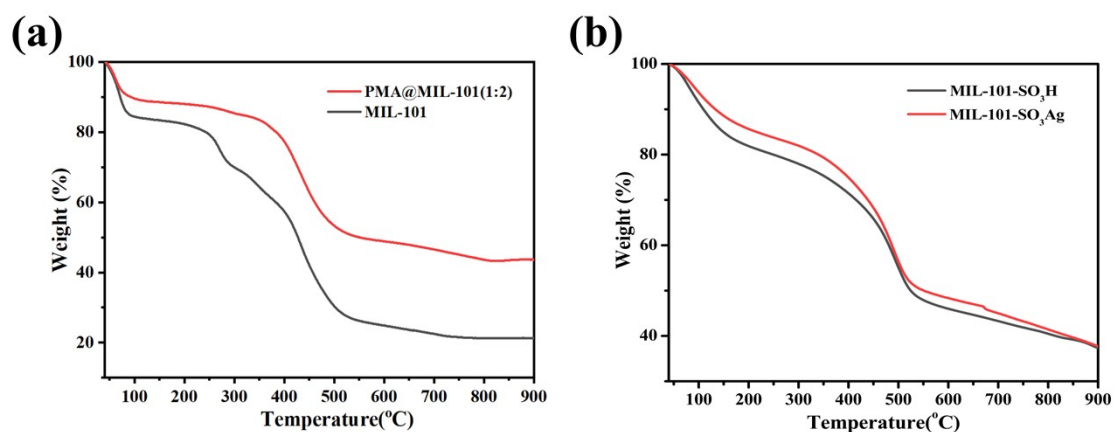

**Fig. S6.** TGA curves of pristine and optimized (a) **MIL-101** and (b) **MIL-101-SO<sub>3</sub>H** series powder.

**Table S2.** The content of Mo in **PMA@MIL-101** series and Ag(I) in **MIL-101-SO<sub>3</sub>Ag** /**UiO-66-SO<sub>3</sub>Ag** calculated by ICP results.

| Filler                     | Mo (wt%) | Ag(I) (wt%) |
|----------------------------|----------|-------------|
| PMA@MIL-101(1:3)           | 10.06    | -           |
| PMA@MIL-101(1:2)           | 16.40    | -           |
| PMA@MIL-101(1:1)           | 18.23    | -           |
| MIL-101-SO <sub>3</sub> Ag | -        | 0.63        |
| UiO-66-SO <sub>3</sub> Ag  | -        | 1.13        |

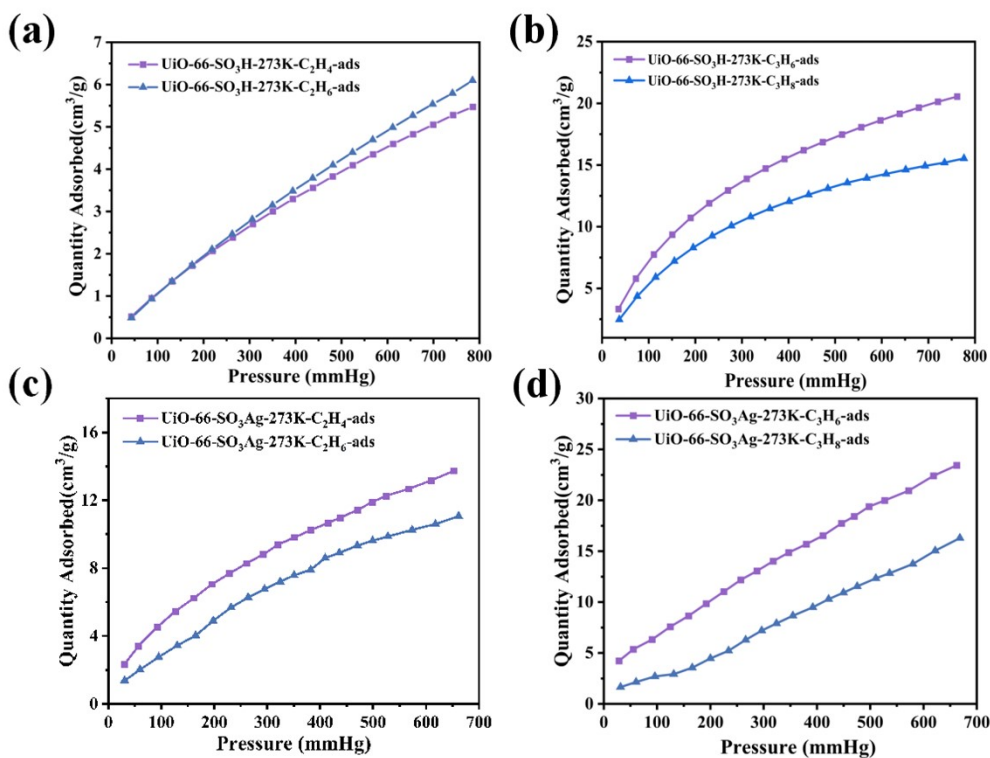

**Fig. S7.** (a) Comparison of the gas uptake of C<sub>2</sub>H<sub>4</sub> and C<sub>2</sub>H<sub>6</sub> for **UiO-66-SO<sub>3</sub>H** at 273 K; (b) Comparison of the gas uptake of C<sub>3</sub>H<sub>6</sub> and C<sub>3</sub>H<sub>8</sub> for **UiO-66-SO<sub>3</sub>H** at 273 K; (c) Comparison of the gas uptake of C<sub>2</sub>H<sub>4</sub> and C<sub>2</sub>H<sub>6</sub> for **UiO-66-SO<sub>3</sub>Ag** at 273 K; (d) Comparison of the gas uptake of C<sub>3</sub>H<sub>6</sub> and C<sub>3</sub>H<sub>8</sub> for **UiO-66-SO<sub>3</sub>Ag** at 273 K.

### 3. Characterizations and performance of membranes

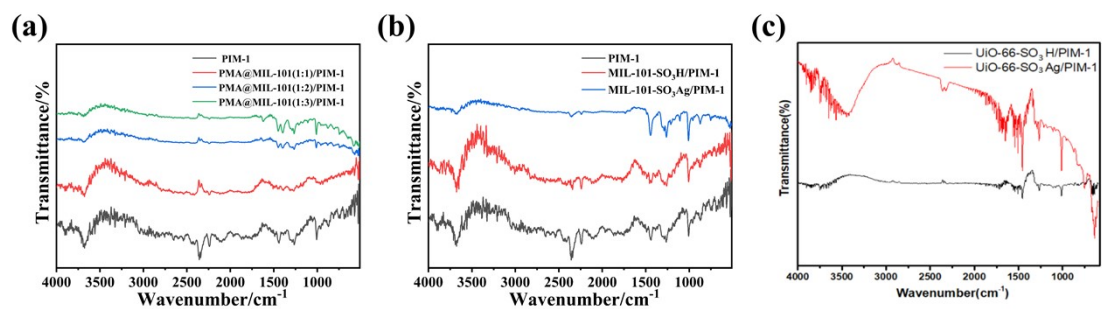

**Fig. S8.** Comparison of the FTIR for pristine and optimized (a) **MIL-101** and (b) **MIL-101-SO<sub>3</sub>H** and (c) **UiO-66-SO<sub>3</sub>H** membranes.

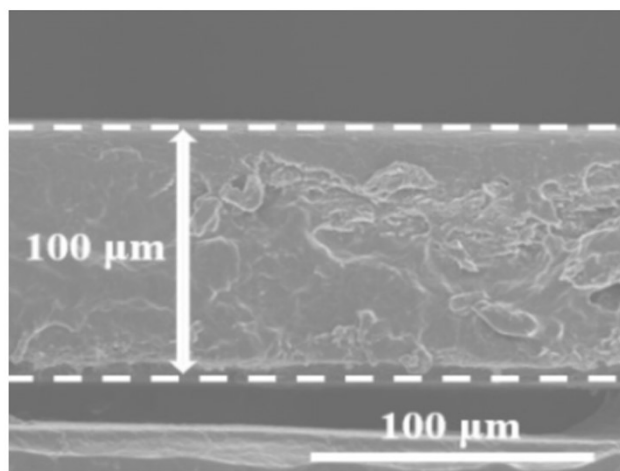

**Fig. S9.** The cross-sectional SEM images of **PIM-1**.



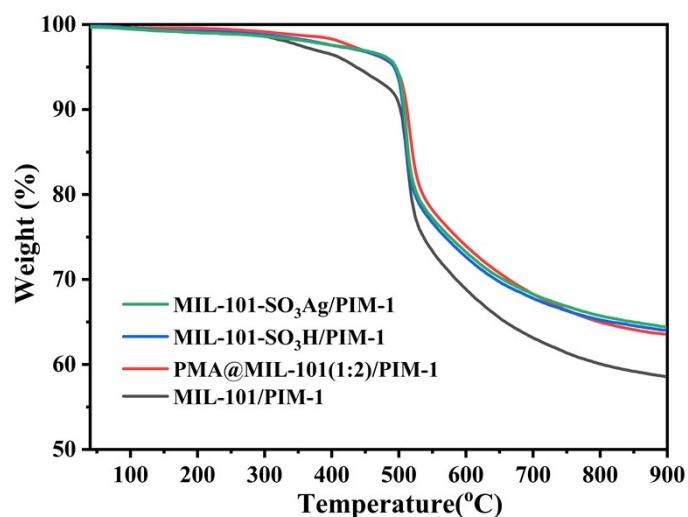

**Fig. S10.** TGA of MIL-101 and MIL-101-SO<sub>3</sub>H series MMMs under a N<sub>2</sub> atmosphere.

**Table S3** The thicknesses of the membranes measured based on the SEM image or with the digital micrometer

| membrane                         | T <sub>SEM</sub> (μm) | T <sub>micrometer</sub> (μm) |
|----------------------------------|-----------------------|------------------------------|
| PIM-1                            | 100±5                 | 102±4                        |
| MIL-101/PIM-1                    | 78±3                  | 75±2                         |
| 7.5% PMA@MIL-101(1:2)/PIM-1      | 62±1                  | 65±1                         |
| MIL-101-SO <sub>3</sub> H/PIM-1  | 74±2                  | 75±3                         |
| MIL-101-SO <sub>3</sub> Ag/PIM-1 | 85±3                  | 82±2                         |
| UiO-66-SO <sub>3</sub> H/PIM-1   | 76±2                  | 73±2                         |
| UiO-66-SO <sub>3</sub> Ag/PIM-1  | 81±2                  | 85±4                         |

**Table S4** The permeability and the separation factor for all the membranes

| Membrane                         | Permeability |          |                 | Permeability |          |                 |
|----------------------------------|--------------|----------|-----------------|--------------|----------|-----------------|
|                                  | (Barrer)     |          | $C_2H_4/C_2H_6$ | (Barrer)     |          | $C_3H_6/C_3H_8$ |
|                                  | $C_2H_4$     | $C_2H_6$ | selectivity     | $C_3H_6$     | $C_3H_8$ | selectivity     |
| PIM-1                            | 1289±20      | 876±6    | 1.47±0.01       | 1562±18      | 698±7    | 2.23±0.03       |
| 7.5%MIL-101/PIM-1                | 1833±4       | 742±9    | 2.47±0.03       | 1421±35      | 348±13   | 4.08±0.06       |
| 7.5%PMA@MIL-101(1:2)/PIM-1       | 1632±9       | 567±9    | 2.88±0.06       | 1480±93      | 248±19   | 5.96±0.14       |
| 10%PMA@MIL-101(1:2)/PIM-1        | 3166±78      | 1702±36  | 1.86±0.07       | 1640±11      | 418±5    | 3.92±0.02       |
| MIL-101-SO <sub>3</sub> H/PIM-1  | 2037±134     | 1329±143 | 1.53±0.06       | 1828±56      | 769±59   | 2.38±0.11       |
| MIL-101-SO <sub>3</sub> Ag/PIM-1 | 1456±28      | 420±13   | 3.47±0.16       | 1663±6       | 428±7    | 3.89±0.07       |
| UiO-66-SO <sub>3</sub> H/PIM-1   | 2239±96      | 1566±66  | 1.43±0.07       | 3761±161     | 2149±200 | 1.75±0.10       |
| UiO-66-SO <sub>3</sub> Ag/PIM-1  | 869±5        | 349±2    | 2.49±0.03       | 1233±50      | 281±17   | 4.39±0.08       |
